# Supplementary material for: Metacognitively ALERT In Science
Source: Research Square preprint supplement (doi:10.21203/rs.3.rs-975418/v1), 2021-10-26
Supplement: Supplementary file 1 [file 400a78866ec2b2e5fa77d91f.docx]

**Appendix 2: Interview Questions for Animal Science Honours students**

1. What degree program did you study? In what major?
2. What is your current study pattern and/ or employment?
3. What are the strengths of your research skills?

Where/how were these developed?

Areas that you may still be developing?

1. How relevant are research skills to your current contexts?
2. In what ways are you using research skills in your employment/teaching/study?
3. In which course or year developed your research skills the most so far?
4. In Chicken & Egg e-Sim for Year 1 (Hazel, 2011a) and Companion Animal and Equine Studies for Year 2 (Hazel, 2011b) the lecturers made research skills explicit by showing these 6 facets of research skills (show list). How aware were you that they are designed to increase autonomy in assignments from first year?
5. What would you say is the relevance of each of the following to you now in Honours, and to any students who you teach/supervise/tutor? What do you think the purpose of using this RSD in Honours?
6. Have you seen these 6 facets before (provide title of each in turn)? If yes, where, what differences has each made?
   1. Initiating/ clarifying, whether by posing questions/establishing problems or gaps/determining project goals
   2. Finding relevant information or generating appropriate data
   3. Evaluating information and data and reflecting on the process to generate
   4. Organising information/data and managing the process
   5. Analysing and synthesising
   6. Communicating and applying
7. What would have happened if you didn’t have structured guidance (or explicitly develop research skills) from the first year? What difference would have been made? (beneficial or hindering)
8. What would have happened if you did (explicitly develop research skills) have over consecutive years? What difference would have been made? (beneficial or hindering)
9. What is your current perspective of use of the RSD

For yourself

For undergraduate students generally

Across your degree program?

1. Are there any other factors that we haven’t discussed that helped or hindered you to develop research skills?
2. Which assignments in your 3 years of university do you think helped you in developing your research skills the most?
3. Did the fenced dog park assignment help you to develop any research skills? If so, which ones?
